# Supplementary material for: An improved genome assembly uncovers prolific tandem repeats in Atlantic cod
Source: PubMed Central journal article supplement (PMC5241972; doi:10.1186/s12864-016-3448-x), 2017-01-18
Supplement: 12864_2016_3448_MOESM1_ESM.pdf [file 12864_2016_3448_MOESM1_ESM.pdf]

Additional file

## **An improved genome assembly uncovers prolific tandem repeats in Atlantic cod**

**Ole K. Tørresen<sup>1†</sup>, Bastiaan Star<sup>1</sup>, Sissel Jentoft<sup>1,2</sup>, William Brynildsen Reinart<sup>1</sup>, Harald Grove<sup>3</sup>, Jason R. Miller<sup>4</sup>, Brian P. Walenz<sup>5</sup>, James Knight<sup>6</sup>, Jenny M. Ekholm<sup>7</sup>, Paul Peluso<sup>7</sup>, Rolf B. Edvardsen<sup>8</sup>, Ave Tooming-Klundrerud<sup>1</sup>, Morten Skage<sup>1</sup>, Sigbjørn Lien<sup>3</sup>, Kjetill S. Jakobsen<sup>1</sup> and Alexander J. Nederbragt<sup>1,9†</sup>**

### **Addresses:**

<sup>1</sup>Centre for Ecological and Evolutionary Synthesis (CEES), Department of Biosciences, University of Oslo, NO-0316 Oslo, Norway.

<sup>2</sup>Department of Natural Sciences, University of Agder, NO-4604 Kristiansand, Norway.

<sup>3</sup> Centre for Integrative Genetics (CIGENE), Department of Animal and Aquacultural Sciences, Norwegian University of Life Sciences, NO-1432, Ås, Norway.

<sup>4</sup> J. Craig Venter Institute, 9704 Medical Center Drive, 20850, Rockville, MD, USA.

<sup>5</sup> Genome Informatics Section, Computational and Statistical Genomics Branch, National Human Genome Research Institute, National Institutes of Health, 20892, Bethesda, MD, USA.

<sup>6</sup> Yale School of Medicine, Yale University, 06520, New Haven, CT, USA.

<sup>7</sup> Pacific Biosciences, Menlo Park, CA, USA.

<sup>8</sup> Institute of Marine Research, Nordnes, NO-5817, Bergen, Norway.

<sup>9</sup> Biomedical Informatics Research Group, Department of Informatics, University of Oslo, NO-0316 Oslo, Norway

<sup>†</sup>Corresponding authors: E-mail: o.k.torresen@ibv.uio.no, lex.nederbragt@ibv.uio.no

## 1 Supplementary Figures

**Additional file 1: Figure S1:** The frequency of tandem repeats in genome assembly, promoters and coding regions.

As Figure 5 in the manuscript, but plotting the number of TRs detected per Mbp assembly instead (frequency).

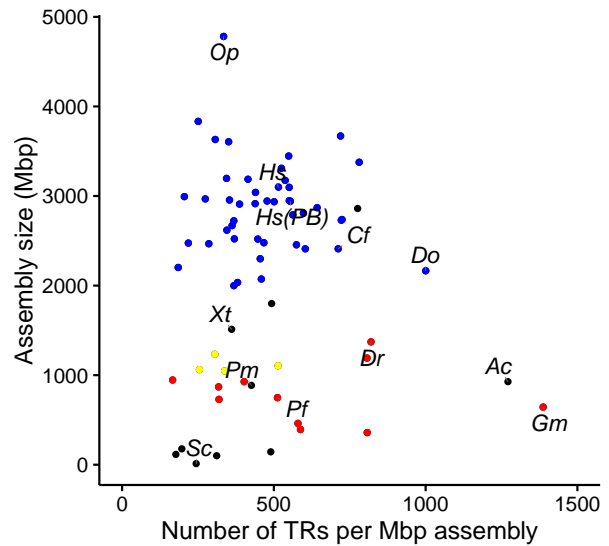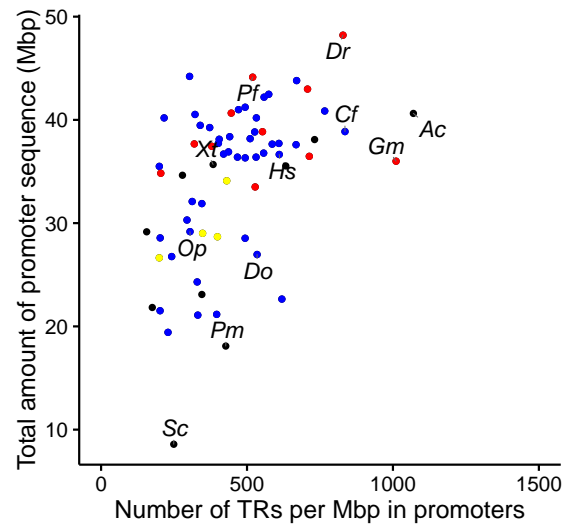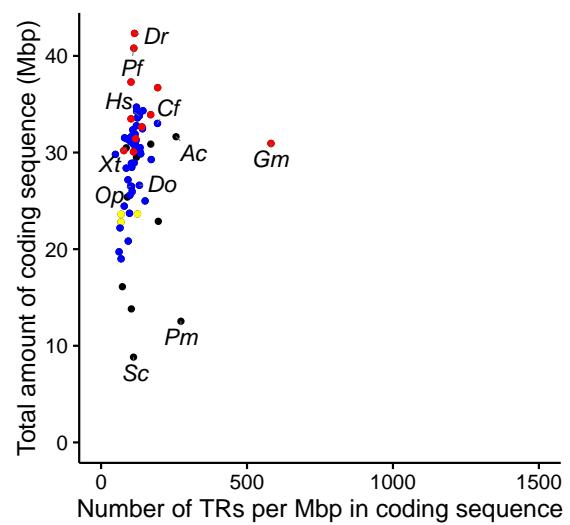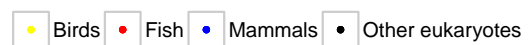



**Additional file 1: Figure S3:** The distribution of lengths of STRs in cod as found by lobSTR and Phobos.

Only repeats of unit size 1-6 bp and of total length longer than 13 bp are included.

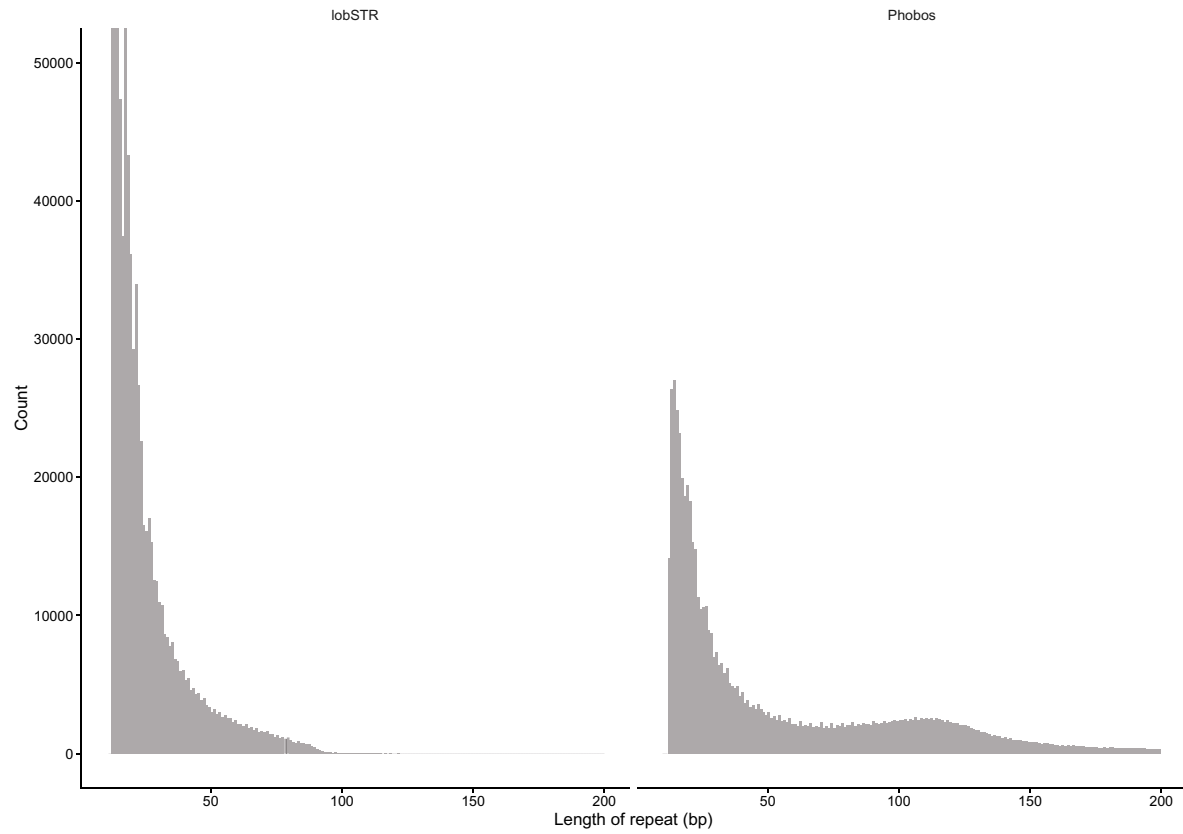

**Additional file 1: Figure S4:** Tandem repeats in genes.

Percentage of genes (vertical axis) with a certain number of tandem repeats (i.e.; 0, 1, 2, 4 or more individual repeats within the genes, horizontal axis) in selected species.

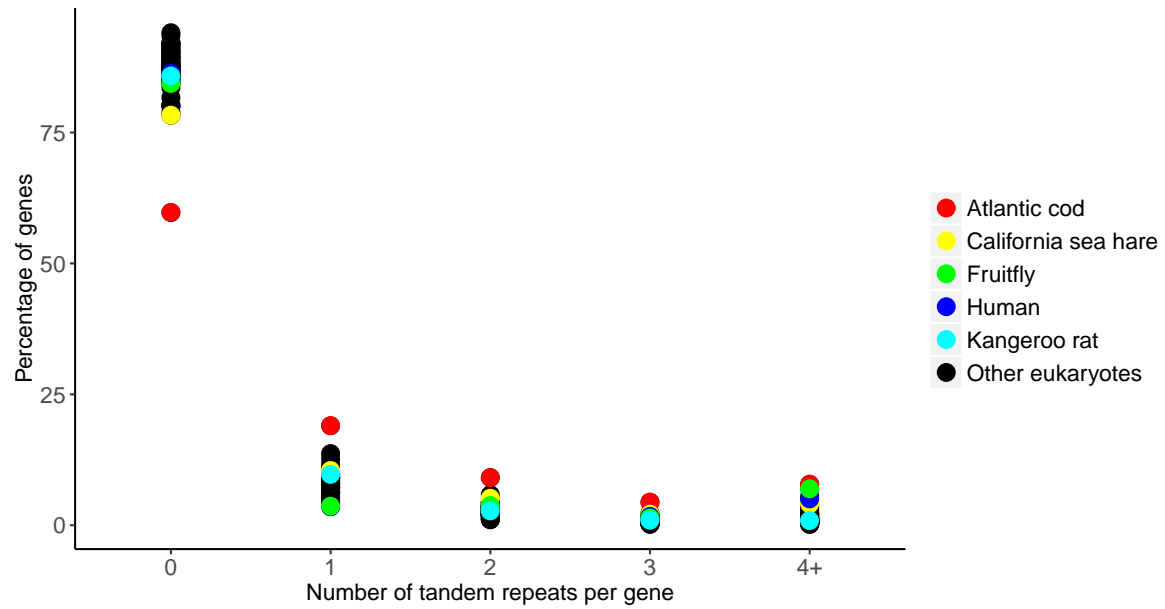

## 2 Supplementary Tables

Additional file 1: Table S1: Read datasets, accession numbers and amount.

| Technology    | Insert size (bp) | Average read length (bp) | Amount bases (Gbp) | Number of pairs | Total coverage | APLILM NEWB454 | CA454ILMCA454PB |
|---------------|------------------|--------------------------|--------------------|-----------------|----------------|----------------|-----------------|
| Illumina      | 180              | 100                      | 97                 | 485,469,807     | 105x           | 52x            | 25x             |
| Illumina      | 300              | 100                      | 116                | 580,675,602     | 140x           | 140x           | 6x              |
| Illumina      | 5000             | 100                      | 103                | 513,197,070     | 124x           | 124x           | 124x            |
| 454           | 1000             | 170                      | 0.4                | 1,185,540       | 0.6x           | 0.6x           | 0.6x            |
| 454           | 1400             | 170                      | 0.3                | 939,375         | 0.5x           | 0.5x           | 0.5x            |
| 454           | 1800             | 175                      | 0.4                | 1,174,856       | 0.6x           | 0.6x           | 0.6x            |
| 454           | 2300             | 160                      | 0.5                | 1,424,229       | 0.7x           | 0.7x           | 0.7x            |
| 454           | 3000             | 170                      | 1.2                | 3,627,219       | 1.9x           | 1.9x           | 1.9x            |
| 454           | 8000             | 175                      | 1.4                | 3,876,715       | 2.1x           | 2.1x           | 2.1x            |
| 454           | 20000            | 200                      | 0.3                | 818,578         | 0.5x           | 0.5x           | 0.5x            |
| 454           | Not paired       | 340                      | 23.6               | NA              | 36.3x          | 36.3x          | 36.3x           |
| PacBio (C2C2) | Not paired       | 2400                     | 7.1                | NA              | 11.0x          |                | 11.0x           |
| PacBio (C2XL) | Not paired       | 3500                     | 2.3                | NA              | 3.5x           |                | 3.5x            |
| PacBio (XLXL) | Not paired       | 3800                     | 2.8                | NA              | 4.4x           |                | 4.4x            |
| Sanger        | 100000           | 900                      | 0.07               | 39,017          | 0.1x           |                | 0.1x            |

**Additional file 1: Table S2:** Overview of assembly statistics. CEGMA annotates 458 highly conserved eukaryotic genes, REAPR analyses the discordance between the expected order, orientation and distance of mapped paired reads, with  $FRC^{bam}$  using a similar approach. Assemblies chosen for reconciliation in bold.

| Assembly                 | Total size assembly (Mbp) | N50 contig (kbp) | N50 scaffold (Mbp) | Percentage gap bases | CEGMA               | REAPR <sup>1</sup> | $FRC^{bam2}$     | Potential conflict (sequences) <sup>3</sup> |
|--------------------------|---------------------------|------------------|--------------------|----------------------|---------------------|--------------------|------------------|---------------------------------------------|
| ALPILM                   | 660                       | 4.4              | 0.16               | 28.7                 | 424 (92.6 %)        | 19,787             | 2,182,096        | 122                                         |
| + Pilon                  | 660                       | 4.5              | 0.16               | 28.5                 | 427 (93.2 %)        | 18,668             | 2,171,880        | 123                                         |
| + PBJelly                | 620                       | 8.3              | 0.16               | 9.7                  | 431 (94.1 %)        | 23,994             | 1,878,873        | 134                                         |
| <b>+ PBJelly + Pilon</b> | <b>620</b>                | <b>8.5</b>       | <b>0.16</b>        | <b>9.6</b>           | <b>431 (94.1 %)</b> | <b>24,066</b>      | <b>1,828,800</b> | <b>134</b>                                  |
| NEWB454                  | 656                       | 6.2              | 1.30               | 24.4                 | 435 (95.0 %)        | 18,117             | 2,044,008        | 26                                          |
| + Pilon                  | 656                       | 6.6              | 1.30               | 24.0                 | 430 (93.9 %)        | 15,917             | 2,018,862        | 19                                          |
| + PBJelly                | 646                       | 10.2             | 1.30               | 15.4                 | 437 (95.4 %)        | 16,930             | 1,875,518        | 28                                          |
| <b>+ PBJelly + Pilon</b> | <b>645</b>                | <b>10.4</b>      | <b>1.30</b>        | <b>15.1</b>          | <b>437 (95.4 %)</b> | <b>17,534</b>      | <b>1,822,739</b> | <b>28</b>                                   |
| CA454ILM                 | 647                       | 9.9              | 0.50               | 3.5                  | 447 (97.5 %)        | 7,406              | 1,351,500        | 96                                          |
| <b>+ Pilon</b>           | <b>648</b>                | <b>10.2</b>      | <b>0.50</b>        | <b>3.4</b>           | <b>444 (97.0 %)</b> | <b>7,025</b>       | <b>1,339,572</b> | <b>83</b>                                   |
| + PBJelly                | 672                       | 15.3             | 0.52               | 2.5                  | 447 (97.5 %)        | 14,755             | 1,449,619        | 98                                          |
| + PBJelly + Pilon        | 673                       | 15.6             | 0.52               | 2.5                  | 444 (97.0 %)        | 14,750             | 1,438,035        | 92                                          |
| CA454PB                  | 682                       | 95               | 0.27               | 1.62                 | 431 (97.6 %)        | 8,617              | 1,508,054        | 188                                         |
| + Pilon                  | 683                       | 95               | 0.27               | 1.6                  | 441 (96.3 %)        | 7,754              | 1,426,588        | 163                                         |
| + PBJelly                | 687                       | 96               | 0.27               | 1.1                  | 436 (95.2 %)        | 8,565              | 1,502,582        | 163                                         |
| <b>+ PBJelly + Pilon</b> | <b>684</b>                | <b>97</b>        | <b>0.27</b>        | <b>1.1</b>           | <b>439 (95.6 %)</b> | <b>9,043</b>       | <b>1,418,020</b> | <b>165</b>                                  |

<sup>1</sup> detected potential errors, fewer is better

<sup>2</sup> total number of features (i.e., potential assembly problems), fewer is better

<sup>3</sup> number of sequences mapping to more than one linkage group or to multiple linkage groups, fewer is better

**Additional file 1: Table S3:** Linkage groups and their sizes.

| Linkage group | Size (bp)  |
|---------------|------------|
| 1             | 28,303,952 |
| 2             | 24,054,406 |
| 3             | 29,451,055 |
| 4             | 34,805,322 |
| 5             | 24,074,055 |
| 6             | 25,464,620 |
| 7             | 31,232,877 |
| 8             | 26,796,886 |
| 9             | 25,382,314 |
| 10            | 25,304,306 |
| 11            | 28,942,968 |
| 12            | 27,297,974 |
| 13            | 25,676,735 |
| 14            | 29,296,932 |
| 15            | 26,597,959 |
| 16            | 31,093,243 |
| 17            | 19,149,207 |
| 18            | 22,554,255 |
| 19            | 21,176,260 |
| 20            | 24,149,133 |
| 21            | 22,510,304 |
| 22            | 21,735,703 |
| 23            | 23,264,654 |
| Unplaced      | 46,128,564 |



**Additional file 1: Table S4:** Calculating of genome size using odd-sized kmers from 17 through 31 with SGA PreQC.

| k  | Estimated genome size (bp) |
|----|----------------------------|
| 17 | 633,173,903                |
| 19 | 617,492,869                |
| 21 | 615,747,892                |
| 23 | 621,292,036                |
| 25 | 612,150,017                |
| 27 | 606,607,539                |
| 29 | 601,318,671                |
| 31 | 597,207,477                |
